# Supplementary material for: In Vitro Interactions of Amphiphilic Phosphorous Dendrons with Liposomes and Exosomes—Implications for Blood Viscosity Changes
Source: MDPI journal article supplement (doi:10.3390/pharmaceutics14081596), 2022-07-30
Supplement: s1 [file s1]

**Table S1.** Three-way ANOVA results on viscosities of amphiphilic phosphorous dendrons of the first (D1) and second (D2) generation: matching by factors: concentration & dendron generation

| Grouping factor                      | Source of Variation           | % of total variation | SS       | DF | MS       | F (DFn, DFd)              | P value       |
|--------------------------------------|-------------------------------|----------------------|----------|----|----------|---------------------------|---------------|
| <b>Shear rate 1 s<sup>-1</sup></b>   | Concentration                 | 10.08                | 127.1    | 2  | 63.54    | F (2, 20) = 14.08         | <b>0.0002</b> |
|                                      | Dendron generation            | 0.2578               | 3.251    | 1  | 3.251    | F (0.6111, 6.111) = 1.382 | 0.2496        |
|                                      | Sex                           | 51.05                | 643.8    | 1  | 643.8    | F (1, 10) = 20.37         | <b>0.0011</b> |
|                                      | Concentration x Dendron       | 0.4217               | 5.318    | 2  | 2.659    | F (1.456, 14.56) = 1.337  | 0.283         |
|                                      | Concentration x Sex           | 0.04126              | 0.5203   | 2  | 0.2601   | F (2, 20) = 0.05764       | 0.9441        |
|                                      | Dendron x Sex                 | 0.5776               | 7.283    | 1  | 7.283    | F (1, 10) = 3.095         | <b>0.109</b>  |
|                                      | Concentration x Dendron x Sex | 0.3352               | 4.227    | 2  | 2.113    | F (2, 20) = 1.063         | 0.3643        |
|                                      | Subject                       | 25.06                | 316      | 10 | 31.6     |                           |               |
|                                      | Subject x Concentration       | 7.158                | 90.26    | 20 | 4.513    |                           |               |
|                                      | Subject x Dendron             | 1.866                | 23.53    | 10 | 2.353    |                           |               |
|                                      | Residual                      |                      | 39.78    | 20 | 1.1      |                           |               |
| <b>Shear rate 10 s<sup>-1</sup></b>  | Concentration                 | 10.56                | 26.2     | 2  | 13.1     | F (2, 20) = 14.65         | <b>0.0001</b> |
|                                      | Dendron generation            | 0.3672               | 0.9112   | 1  | 0.9112   | F (0.5152, 5.152) = 1.893 | 0.1968        |
|                                      | Sex                           | 48.71                | 120.9    | 1  | 120.9    | F (1, 10) = 16.54         | <b>0.0023</b> |
|                                      | Concentration x Dendron       | 0.06749              | 0.1675   | 2  | 0.08375  | F (1.672, 16.72) = 0.8242 | 0.4359        |
|                                      | Concentration x Sex           | 0.1837               | 0.4558   | 2  | 0.1      | F (2, 20) = 0.2550        | 0.7774        |
|                                      | Dendron x Sex                 | 0.6649               | 1.65     | 1  | 1.65     | F (1, 10) = 3.428         | <b>0.0938</b> |
|                                      | Concentration x Dendron x Sex | 0.03637              | 0.09028  | 2  | 0.04514  | F (2, 20) = 0.4442        | 0.6475        |
|                                      | Subject                       | 29.45                | 73.09    | 10 | 7.309    |                           |               |
|                                      | Subject x Concentration       | 7.203                | 17.88    | 20 | 0.8938   |                           |               |
|                                      | Subject x Dendron             | 1.939                | 4.814    | 10 | 0.4814   |                           |               |
|                                      | Residual                      |                      | 2.032    | 20 | 0.1016   |                           |               |
| <b>Shear rate 100 s<sup>-1</sup></b> | Concentration                 | 9.907                | 6.826    | 2  | 3.413    | F (2, 20) = 12.30         | <b>0.0003</b> |
|                                      | Dendron generation            | 0.3066               | 0.2112   | 1  | 0.2112   | F (0.5122, 5.122) = 1.875 | 0.198         |
|                                      | Sex                           | 37.1                 | 25.56    | 1  | 25.56    | F (1, 10) = 8.906         | <b>0.0137</b> |
|                                      | Concentration x Dendron       | 0.1318               | 0.09083  | 2  | 0.1      | F (1.649, 16.49) = 1.441  | 0.262         |
|                                      | Concentration x Sex           | 0.1101               | 0.07583  | 2  | 0.03792  | F (2, 20) = 0.1367        | 0.8731        |
|                                      | Dendron x Sex                 | 0.1695               | 0.1168   | 1  | 0.1168   | F (1, 10) = 1.036         | 0.3326        |
|                                      | Concentration x Dendron x Sex | 0.0125               | 0.008611 | 2  | 0.004306 | F (2, 20) = 0.1366        | 0.8732        |
|                                      | Subject                       | 41.66                | 28.7     | 10 | 2.87     |                           |               |
|                                      | Subject x Concentration       | 8.053                | 5.548    | 20 | 0.2774   |                           |               |
|                                      | Subject x Dendron             | 1.636                | 1.127    | 10 | 0.1127   |                           |               |
|                                      | Residual                      |                      | 0.6306   | 20 | 0.03153  |                           |               |

Abbreviations: SS, sum of squares; DF, degree of freedom; MS, mean squares; F, F statistics; P, probability

**Table S2.** Three-way ANOVA results on viscosities of amphiphilic phosphorous dendrons of the first (D1) and second (D2) generation: matching by factors: concentration & dendron generation

| Tukey's multiple comparisons test | Shear rate 1 s <sup>-1</sup> |        |           |                   |                  | Shear rate 10 s <sup>-1</sup> |        |           |                    |                  | Shear rate 100 s <sup>-1</sup> |        |           |                    |                  |
|-----------------------------------|------------------------------|--------|-----------|-------------------|------------------|-------------------------------|--------|-----------|--------------------|------------------|--------------------------------|--------|-----------|--------------------|------------------|
|                                   | Mean 1                       | Mean 2 | Mean Diff | 95% CI of diff.   | Adjusted P Value | Mean 1                        | Mean 2 | Mean Diff | 95% CI of diff.    | Adjusted P Value | Mean 1                         | Mean 2 | Mean Diff | 95% CI of diff.    | Adjusted P Value |
| c0:D1 Female vs. c0:D1 Male       | 12.43                        | 17.63  | -5.2      | -10.03 to -0.3734 | 0.0327           | 6.267                         | 8.4    | -2.133    | -3.796 to -0.4705  | 0.0142           | 3.933                          | 4.95   | -1.017    | -2.155 to 0.1221   | 0.0835           |
| c0:D1 Female vs. c0:D2 Female     | 12.43                        | 12.05  | 0.3833    | -0.8668 to 1.633  | 0.861            | 6.267                         | 6.3    | -0.033    | -0.4900 to 0.4234  | >0,9999          | 3.933                          | 3.9    | 0.033     | -0.1850 to 0.2517  | 0.998            |
| c0:D1 Female vs. c0:D2 Male       | 12.43                        | 18.72  | -6.283    | -13.05 to 0.4795  | 0.0741           | 6.267                         | 8.9    | -2.633    | -4.366 to -0.9005  | 0.0033           | 3.933                          | 5.117  | -1.183    | -2.321 to -0.04538 | 0.0412           |
| c0:D1 Female vs. c1:D1 Female     | 12.43                        | 14.03  | -1.6      | -5.308 to 2.108   | 0.5854           | 6.267                         | 7.02   | -0.75     | -2.170 to 0.6698   | 0.392            | 3.933                          | 4.267  | -0.333    | -1.109 to 0.4425   | 0.5896           |
| c0:D1 Female vs. c1:D1 Male       | 12.43                        | 19.83  | -7.4      | -12.36 to -2.442  | 0.0036           | 6.267                         | 9.45   | -3.183    | -5.768 to -0.5986  | 0.0147           | 3.933                          | 5.4    | -1.467    | -3.033 to 0.09923  | 0.0715           |
| c0:D1 Female vs. c1:D2 Female     | 12.43                        | 13.83  | -1.4      | -6.174 to 3.374   | 0.8851           | 6.267                         | 6.83   | -0.567    | -2.498 to 1.365    | 0.8849           | 3.933                          | 4.267  | -0.333    | -1.457 to 0.7907   | 0.8793           |
| c0:D1 Female vs. c1:D2 Male       | 12.43                        | 19.63  | -7.2      | -12.96 to -1.441  | 0.0121           | 6.267                         | 9.82   | -3.55     | -5.367 to -1.733   | 0.0004           | 3.933                          | 5.5    | -1.567    | -2.772 to -0.3610  | 0.0097           |
| c0:D1 Female vs. c2:D1 Female     | 12.43                        | 15.38  | -2.95     | -7.452 to 1.552   | 0.2211           | 6.267                         | 7.63   | -1.367    | -3.270 to 0.5368   | 0.1663           | 3.933                          | 4.533  | -0.6      | -1.536 to 0.3359   | 0.2359           |
| c0:D1 Female vs. c2:D1 Male       | 12.43                        | 20.42  | -7.983    | -12.79 to -3.174  | 0.0018           | 6.267                         | 9.93   | -3.667    | -6.576 to -0.7572  | 0.0135           | 3.933                          | 5.717  | -1.783    | -3.515 to -0.05155 | 0.0425           |
| c0:D1 Female vs. c2:D2 Female     | 12.43                        | 15.33  | -2.9      | -7.399 to 1.599   | 0.2321           | 6.267                         | 7.55   | -1.283    | -4.041 to 1.474    | 0.5121           | 3.933                          | 4.65   | -0.717    | -2.373 to 0.9394   | 0.5827           |
| c0:D1 Female vs. c2:D2 Male       | 12.43                        | 22.72  | -10.28    | -15.70 to -4.871  | 0.0005           | 6.267                         | 10.7   | -4.383    | -7.454 to -1.313   | 0.0065           | 3.933                          | 6.017  | -2.083    | -3.849 to -0.3178  | 0.0192           |
| c0:D1 Male vs. c0:D2 Female       | 17.63                        | 12.05  | 5.583     | 0.3399 to 10.83   | 0.0354           | 8.4                           | 6.3    | 2.1       | 0.3852 to 3.815    | 0.0183           | 4.95                           | 3.9    | 1.05      | 0.07515 to 2.025   | 0.0344           |
| c0:D1 Male vs. c0:D2 Male         | 17.63                        | 18.72  | -1.083    | -6.771 to 4.604   | 0.9899           | 8.4                           | 8.9    | -0.5      | -2.132 to 1.132    | 0.8615           | 4.95                           | 5.117  | -0.167    | -0.9071 to 0.5738  | 0.9707           |
| c0:D1 Male vs. c1:D1 Female       | 17.63                        | 14.03  | 3.6       | -2.729 to 9.929   | 0.4346           | 8.4                           | 7.02   | 1.383     | -1.501 to 4.268    | 0.5221           | 4.95                           | 4.267  | 0.683     | -1.134 to 2.501    | 0.7583           |
| c0:D1 Male vs. c1:D1 Male         | 17.63                        | 19.83  | -2.2      | -8.506 to 4.106   | 0.7739           | 8.4                           | 9.45   | -1.05     | -3.209 to 1.109    | 0.4695           | 4.95                           | 5.4    | -0.45     | -1.652 to 0.7515   | 0.716            |
| c0:D1 Male vs. c1:D2 Female       | 17.63                        | 13.83  | 3.8       | -3.682 to 11.28   | 0.5315           | 8.4                           | 6.83   | 1.567     | -1.916 to 5.049    | 0.5744           | 4.95                           | 4.267  | 0.683     | -1.452 to 2.819    | 0.8623           |
| c0:D1 Male vs. c1:D2 Male         | 17.63                        | 19.63  | -2        | -6.322 to 2.322   | 0.5176           | 8.4                           | 9.82   | -1.417    | -2.750 to -0.08350 | 0.0392           | 4.95                           | 5.5    | -0.55     | -1.174 to 0.07357  | 0.0811           |
| c0:D1 Male vs. c2:D1 Female       | 17.63                        | 15.38  | 2.25      | -5.254 to 9.754   | 0.9372           | 8.4                           | 7.63   | 0.7667    | -2.537 to 4.071    | 0.9734           | 4.95                           | 4.533  | 0.417     | -1.568 to 2.402    | 0.9869           |
| c0:D1 Male vs. c2:D1 Male         | 17.63                        | 20.42  | -2.783    | -8.339 to 2.772   | 0.4411           | 8.4                           | 9.93   | -1.533    | -4.156 to 1.089    | 0.3047           | 4.95                           | 5.717  | -0.767    | -2.198 to 0.6651   | 0.3797           |
| c0:D1 Male vs. c2:D2 Female       | 17.63                        | 15.33  | 2.3       | -5.797 to 10.40   | 0.9494           | 8.4                           | 7.55   | 0.85      | -3.454 to 5.154    | 0.9895           | 4.95                           | 4.65   | 0.3       | -2.419 to 3.019    | >0,9999          |
| c0:D1 Male vs. c2:D2 Male         | 17.63                        | 22.72  | -5.083    | -12.81 to 2.640   | 0.2182           | 8.4                           | 10.7   | -2.25     | -5.139 to 0.6387   | 0.1267           | 4.95                           | 6.017  | -1.067    | -2.554 to 0.4202   | 0.1668           |
| c0:D2 Female vs. c0:D2 Male       | 12.05                        | 18.72  | -6.667    | -13.60 to 0.2623  | 0.062            | 6.3                           | 8.9    | -2.6      | -4.375 to -0.8252  | 0.0044           | 3.9                            | 5.117  | -1.217    | -2.197 to -0.2367  | 0.0151           |
| c0:D2 Female vs. c1:D1 Female     | 12.05                        | 14.03  | -1.983    | -4.834 to 0.8669  | 0.1839           | 6.3                           | 7.02   | -0.717    | -2.255 to 0.8219   | 0.5112           | 3.9                            | 4.267  | -0.367    | -1.346 to 0.6128   | 0.7165           |
| c0:D2 Female vs. c1:D1 Male       | 12.05                        | 19.83  | -7.783    | -13.13 to -2.440  | 0.0046           | 6.3                           | 9.45   | -3.15     | -5.747 to -0.5527  | 0.016            | 3.9                            | 5.4    | -1.5      | -3.018 to 0.01767  | 0.0533           |
| c0:D2 Female vs. c1:D2 Female     | 12.05                        | 13.83  | -1.783    | -5.516 to 1.950   | 0.4866           | 6.3                           | 6.83   | -0.533    | -2.586 to 1.519    | 0.9353           | 3.9                            | 4.267  | -0.367    | -1.654 to 0.9204   | 0.8991           |
| c0:D2 Female vs. c1:D2 Male       | 12.05                        | 19.63  | -7.583    | -13.60 to -1.563  | 0.0114           | 6.3                           | 9.82   | -3.517    | -5.370 to -1.663   | 0.0005           | 3.9                            | 5.5    | -1.6      | -2.688 to -0.5116  | 0.0037           |

| Tukey's multiple comparisons test | Shear rate 1 s <sup>-1</sup> |        |           |                    |                  | Shear rate 10 s <sup>-1</sup> |        |           |                    |                  | Shear rate 100 s <sup>-1</sup> |        |           |                     |                  |
|-----------------------------------|------------------------------|--------|-----------|--------------------|------------------|-------------------------------|--------|-----------|--------------------|------------------|--------------------------------|--------|-----------|---------------------|------------------|
|                                   | Mean 1                       | Mean 2 | Mean Diff | 95% CI of diff.    | Adjusted P Value | Mean 1                        | Mean 2 | Mean Diff | 95% CI of diff.    | Adjusted P Value | Mean 1                         | Mean 2 | Mean Diff | 95% CI of diff.     | Adjusted P Value |
| c0:D2 Female vs. c2:D1 Female     | 12.05                        | 15.38  | -3.333    | -6.967 to 0.3006   | 0.07             | 6.3                           | 7.63   | -1.333    | -3.292 to 0.6257   | 0.197            | 3.9                            | 4.533  | -0.633    | -1.773 to 0.5064    | 0.3472           |
| c0:D2 Female vs. c2:D1 Male       | 12.05                        | 20.42  | -8.367    | -13.60 to -3.136   | 0.0027           | 6.3                           | 9.93   | -3.633    | -6.550 to -0.7163  | 0.0143           | 3.9                            | 5.717  | -1.817    | -3.516 to -0.1169   | 0.035            |
| c0:D2 Female vs. c2:D2 Female     | 12.05                        | 15.33  | -3.283    | -6.978 to 0.4110   | 0.0788           | 6.3                           | 7.55   | -1.25     | -4.114 to 1.614    | 0.5744           | 3.9                            | 4.65   | -0.75     | -2.582 to 1.082     | 0.6357           |
| c0:D2 Female vs. c2:D2 Male       | 12.05                        | 22.72  | -10.67    | -16.39 to -4.948   | 0.0006           | 6.3                           | 10.7   | -4.35     | -7.426 to -1.274   | 0.0068           | 3.9                            | 6.017  | -2.117    | -3.853 to -0.3805   | 0.0166           |
| c0:D2 Male vs. c1:D1 Female       | 18.72                        | 14.03  | 4.683     | -2.800 to 12.17    | 0.3904           | 8.9                           | 7.02   | 1.883     | -0.9558 to 4.722   | 0.2611           | 5.117                          | 4.267  | 0.85      | -0.9585 to 2.659    | 0.5623           |
| c0:D2 Male vs. c1:D1 Male         | 18.72                        | 19.83  | -1.117    | -10.98 to 8.748    | 0.9998           | 8.9                           | 9.45   | -0.55     | -4.072 to 2.972    | 0.9977           | 5.117                          | 5.4    | -0.283    | -2.104 to 1.537     | 0.9977           |
| c0:D2 Male vs. c1:D2 Female       | 18.72                        | 13.83  | 4.883     | -3.335 to 13.10    | 0.4472           | 8.9                           | 6.83   | 2.067     | -1.357 to 5.490    | 0.3286           | 5.117                          | 4.267  | 0.85      | -1.276 to 2.976     | 0.7052           |
| c0:D2 Male vs. c1:D2 Male         | 18.72                        | 19.63  | -0.9167   | -5.772 to 3.938    | 0.9905           | 8.9                           | 9.82   | -0.917    | -2.757 to 0.9235   | 0.4466           | 5.117                          | 5.5    | -0.383    | -1.342 to 0.5754    | 0.6576           |
| c0:D2 Male vs. c2:D1 Female       | 18.72                        | 15.38  | 3.333     | -4.900 to 11.57    | 0.8442           | 8.9                           | 7.63   | 1.267     | -1.981 to 4.515    | 0.7669           | 5.117                          | 4.533  | 0.583     | -1.392 to 2.559     | 0.9139           |
| c0:D2 Male vs. c2:D1 Male         | 18.72                        | 20.42  | -1.7      | -9.967 to 6.567    | 0.9832           | 8.9                           | 9.93   | -1.033    | -4.922 to 2.855    | 0.9275           | 5.117                          | 5.717  | -0.6      | -2.650 to 1.450     | 0.886            |
| c0:D2 Male vs. c2:D2 Female       | 18.72                        | 15.33  | 3.383     | -5.274 to 12.04    | 0.8635           | 8.9                           | 7.55   | 1.35      | -2.891 to 5.591    | 0.8807           | 5.117                          | 4.65   | 0.467     | -2.243 to 3.177     | 0.9965           |
| c0:D2 Male vs. c2:D2 Male         | 18.72                        | 22.72  | -4        | -14.26 to 6.263    | 0.6809           | 8.9                           | 10.7   | -1.75     | -5.548 to 2.048    | 0.5216           | 5.117                          | 6.017  | -0.9      | -2.883 to 1.083     | 0.5365           |
| c1:D1 Female vs. c1:D1 Male       | 14.03                        | 19.83  | -5.8      | -12.17 to 0.5719   | 0.0802           | 7.017                         | 9.45   | -2.433    | -5.577 to 0.7106   | 0.1809           | 4.267                          | 5.4    | -1.133    | -3.068 to 0.8010    | 0.4604           |
| c1:D1 Female vs. c1:D2 Female     | 14.03                        | 13.83  | 0.2       | -2.699 to 3.099    | >0,9999          | 7.017                         | 6.83   | 0.1833    | -0.9701 to 1.337   | 0.9973           | 4.267                          | 4.267  | 0         | -0.6127 to 0.6127   | >0,9999          |
| c1:D1 Female vs. c1:D2 Male       | 14.03                        | 19.63  | -5.6      | -12.39 to 1.195    | 0.1356           | 7.017                         | 9.82   | -2.8      | -5.642 to 0.04224  | 0.0539           | 4.267                          | 5.5    | -1.233    | -3.027 to 0.5602    | 0.243            |
| c1:D1 Female vs. c2:D1 Female     | 14.03                        | 15.38  | -1.35     | -2.959 to 0.2587   | 0.0974           | 7.017                         | 7.63   | -0.617    | -1.206 to -0.02750 | 0.0416           | 4.267                          | 4.533  | -0.267    | -0.4393 to -0.09405 | 0.0078           |
| c1:D1 Female vs. c2:D1 Male       | 14.03                        | 20.42  | -6.383    | -12.71 to -0.05884 | 0.0477           | 7.017                         | 9.93   | -2.917    | -6.256 to 0.4227   | 0.1039           | 4.267                          | 5.717  | -1.45     | -3.481 to 0.5810    | 0.251            |
| c1:D1 Female vs. c2:D2 Female     | 14.03                        | 15.33  | -1.3      | -4.548 to 1.948    | 0.6566           | 7.017                         | 7.55   | -0.533    | -2.305 to 1.239    | 0.8715           | 4.267                          | 4.65   | -0.383    | -1.405 to 0.6386    | 0.7147           |
| c1:D1 Female vs. c2:D2 Male       | 14.03                        | 22.72  | -8.683    | -15.27 to -2.093   | 0.009            | 7.017                         | 10.7   | -3.633    | -7.079 to -0.1877  | 0.0365           | 4.267                          | 6.017  | -1.75     | -3.802 to 0.3022    | 0.1169           |
| c1:D1 Male vs. c1:D2 Female       | 19.83                        | 13.83  | 6         | -1.488 to 13.49    | 0.1368           | 9.45                          | 6.83   | 2.617     | -0.9524 to 6.186   | 0.2184           | 5.4                            | 4.267  | 1.133     | -1.039 to 3.306     | 0.5791           |
| c1:D1 Male vs. c1:D2 Male         | 19.83                        | 19.63  | 0.2       | -7.217 to 7.617    | >0,9999          | 9.45                          | 9.82   | -0.367    | -2.384 to 1.651    | 0.9927           | 5.4                            | 5.5    | -0.1      | -1.092 to 0.8916    | >0,9999          |
| c1:D1 Male vs. c2:D1 Female       | 19.83                        | 15.38  | 4.45      | -3.060 to 11.96    | 0.3823           | 9.45                          | 7.63   | 1.817     | -1.618 to 5.252    | 0.5755           | 5.4                            | 4.533  | 0.867     | -1.189 to 2.923     | 0.8033           |
| c1:D1 Male vs. c2:D1 Male         | 19.83                        | 20.42  | -0.5833   | -2.928 to 1.761    | 0.9484           | 9.45                          | 9.93   | -0.483    | -1.333 to 0.3667   | 0.3276           | 5.4                            | 5.717  | -0.317    | -0.7046 to 0.07124  | 0.1075           |
| c1:D1 Male vs. c2:D2 Female       | 19.83                        | 15.33  | 4.5       | -3.590 to 12.59    | 0.4385           | 9.45                          | 7.55   | 1.9       | -2.348 to 6.148    | 0.7179           | 5.4                            | 4.65   | 0.75      | -1.920 to 3.420     | 0.9683           |
| c1:D1 Male vs. c2:D2 Male         | 19.83                        | 22.72  | -2.883    | -5.118 to -0.6483  | 0.0173           | 9.45                          | 10.7   | -1.2      | -2.583 to 0.1831   | 0.0862           | 5.4                            | 6.017  | -0.617    | -1.088 to -0.1455   | 0.0162           |
| c1:D2 Female vs. c1:D2 Male       | 13.83                        | 19.63  | -5.8      | -13.52 to 1.922    | 0.1952           | 6.833                         | 9.82   | -2.983    | -6.395 to 0.4281   | 0.0917           | 4.267                          | 5.5    | -1.233    | -3.330 to 0.8637    | 0.371            |
| c1:D2 Female vs. c2:D1 Female     | 13.83                        | 15.38  | -1.55     | -3.794 to 0.6943   | 0.1883           | 6.833                         | 7.63   | -0.8      | -2.103 to 0.5032   | 0.267            | 4.267                          | 4.533  | -0.267    | -0.8745 to 0.3412   | 0.5694           |
| c1:D2 Female vs. c2:D1 Male       | 13.83                        | 20.42  | -6.583    | -14.07 to 0.8992   | 0.0898           | 6.833                         | 9.93   | -3.1      | -6.808 to 0.6082   | 0.1274           | 4.267                          | 5.717  | -1.45     | -3.692 to 0.7923    | 0.3457           |
| c1:D2 Female vs. c2:D2 Female     | 13.83                        | 15.33  | -1.5      | -4.068 to 1.068    | 0.3057           | 6.833                         | 7.55   | -0.717    | -1.556 to 0.1228   | 0.0915           | 4.267                          | 4.65   | -0.383    | -0.9725 to 0.2058   | 0.2258           |

| Tukey's multiple comparisons test | Shear rate 1 s <sup>-1</sup> |        |           |                  |                  | Shear rate 10 s <sup>-1</sup> |        |           |                    |                  | Shear rate 100 s <sup>-1</sup> |        |           |                   |                  |
|-----------------------------------|------------------------------|--------|-----------|------------------|------------------|-------------------------------|--------|-----------|--------------------|------------------|--------------------------------|--------|-----------|-------------------|------------------|
|                                   | Mean 1                       | Mean 2 | Mean Diff | 95% CI of diff.  | Adjusted P Value | Mean 1                        | Mean 2 | Mean Diff | 95% CI of diff.    | Adjusted P Value | Mean 1                         | Mean 2 | Mean Diff | 95% CI of diff.   | Adjusted P Value |
| c1:D2 Female vs. c2:D2 Male       | 13.83                        | 22.72  | -8.883    | -16.48 to -1.289 | 0.0206           | 6.833                         | 10.7   | -3.817    | -7.605 to -0.02854 | 0.0479           | 4.267                          | 6.017  | -1.75     | -4.008 to 0.5083  | 0.1781           |
| c1:D2 Male vs. c2:D1 Female       | 19.63                        | 15.38  | 4.25      | -3.491 to 11.99  | 0.5164           | 9.817                         | 7.63   | 2.183     | -1.056 to 5.423    | 0.2505           | 5.5                            | 4.533  | 0.967     | -0.9854 to 2.919  | 0.5631           |
| c1:D2 Male vs. c2:D1 Male         | 19.63                        | 20.42  | -0.7833   | -6.513 to 4.946  | 0.9992           | 9.817                         | 9.93   | -0.117    | -2.360 to 2.126    | >0,9999          | 5.5                            | 5.717  | -0.217    | -1.423 to 0.9898  | 0.9933           |
| c1:D2 Male vs. c2:D2 Female       | 19.63                        | 15.33  | 4.3       | -3.948 to 12.55  | 0.5646           | 9.817                         | 7.55   | 2.267     | -1.952 to 6.486    | 0.4379           | 5.5                            | 4.65   | 0.85      | -1.820 to 3.520   | 0.891            |
| c1:D2 Male vs. c2:D2 Male         | 19.63                        | 22.72  | -3.083    | -11.62 to 5.457  | 0.7468           | 9.817                         | 10.7   | -0.833    | -2.886 to 1.219    | 0.6434           | 5.5                            | 6.017  | -0.517    | -1.615 to 0.5812  | 0.5012           |
| c2:D1 Female vs. c2:D1 Male       | 15.38                        | 20.42  | -5.033    | -12.54 to 2.471  | 0.253            | 7.633                         | 9.93   | -2.3      | -5.890 to 1.290    | 0.3615           | 4.533                          | 5.717  | -1.183    | -3.321 to 0.9545  | 0.5311           |
| c2:D1 Female vs. c2:D2 Female     | 15.38                        | 15.33  | 0.05      | -2.109 to 2.209  | >0,9999          | 7.633                         | 7.55   | 0.0833    | -1.600 to 1.766    | >0,9999          | 4.533                          | 4.65   | -0.117    | -1.037 to 0.8040  | 0.9996           |
| c2:D1 Female vs. c2:D2 Male       | 15.38                        | 22.72  | -7.333    | -14.95 to 0.2809 | 0.0609           | 7.633                         | 10.7   | -3.017    | -6.694 to 0.6606   | 0.1403           | 4.533                          | 6.017  | -1.483    | -3.640 to 0.6729  | 0.2856           |
| c2:D1 Male vs. c2:D2 Female       | 20.42                        | 15.33  | 5.083     | -3.017 to 13.18  | 0.304            | 9.933                         | 7.55   | 2.383     | -1.943 to 6.709    | 0.5119           | 5.717                          | 4.65   | 1.067     | -1.636 to 3.770   | 0.8327           |
| c2:D1 Male vs. c2:D2 Male         | 20.42                        | 22.72  | -2.3      | -5.648 to 1.048  | 0.1914           | 9.933                         | 10.7   | -0.717    | -1.781 to 0.3481   | 0.2039           | 5.717                          | 6.017  | -0.3      | -0.8828 to 0.2828 | 0.4158           |
| c2:D2 Female vs. c2:D2 Male       | 15.33                        | 22.72  | -7.383    | -15.54 to 0.7694 | 0.082            | 7.55                          | 10.7   | -3.1      | -7.476 to 1.276    | 0.2475           | 4.65                           | 6.017  | -1.367    | -4.078 to 1.345   | 0.6051           |
